# Supplementary material for: High thermoelectric performance of Cu3SbSe4 nanocrystals with Cu2−xSe in situ inclusions synthesized by a microwave-assisted solvothermal method
Source: Royal Society of Chemistry journal article supplement (doi:10.1039/c8nr03550d), 2018-01-01
Supplement: c8nr03550d1.pdf [file c8nr03550d1.pdf]

## Supporting Information

### High Thermoelectric Performance of $\text{Cu}_3\text{SbSe}_4$ Nanocrystals with $\text{Cu}_{2-x}\text{Se}$ in-situ Inclusions Synthesized by Microwave-assisted Solvothermal Method

Dandan Xie<sup>a</sup>, Bin Zhang<sup>b</sup>, Aijuan Zhang<sup>a</sup>, Yongjin Chen<sup>e</sup>, Yanci Yan<sup>a,d</sup>, Hengquan Yang, Guiwen Wang<sup>b</sup>, Guoyu Wang, Xiaodong Han<sup>e</sup>, Guang Han<sup>\*c</sup>, Xu Lu<sup>\*a</sup>, Xiaoyuan Zhou<sup>\*a,b</sup>

<sup>a</sup>Chongqing Key Laboratory of Soft Condensed Matter Physics and Smart Materials, College of Physics, Chongqing University, Chongqing 401331, China

<sup>b</sup>Analytical and Testing Center, Chongqing University, Chongqing 401331, China

<sup>c</sup>College of Materials Science and Engineering, Chongqing University, Chongqing 400044, China

<sup>d</sup>Chongqing Institute of Green and Intelligent Technology, Chinese Academy of Sciences, Chongqing 400714, China

<sup>e</sup>Beijing Key Laboratory and Institute of Microstructure and Property of Advanced Materials, Beijing University of Technology, Beijing 100124, P. R. China

\*Corresponding authors: Emails: luxu@cqu.edu.cn (X. Lu), xiaoyuan2013@cqu.edu.cn (X. Zhou), guang.han@cqu.edu.cn (G. Han)

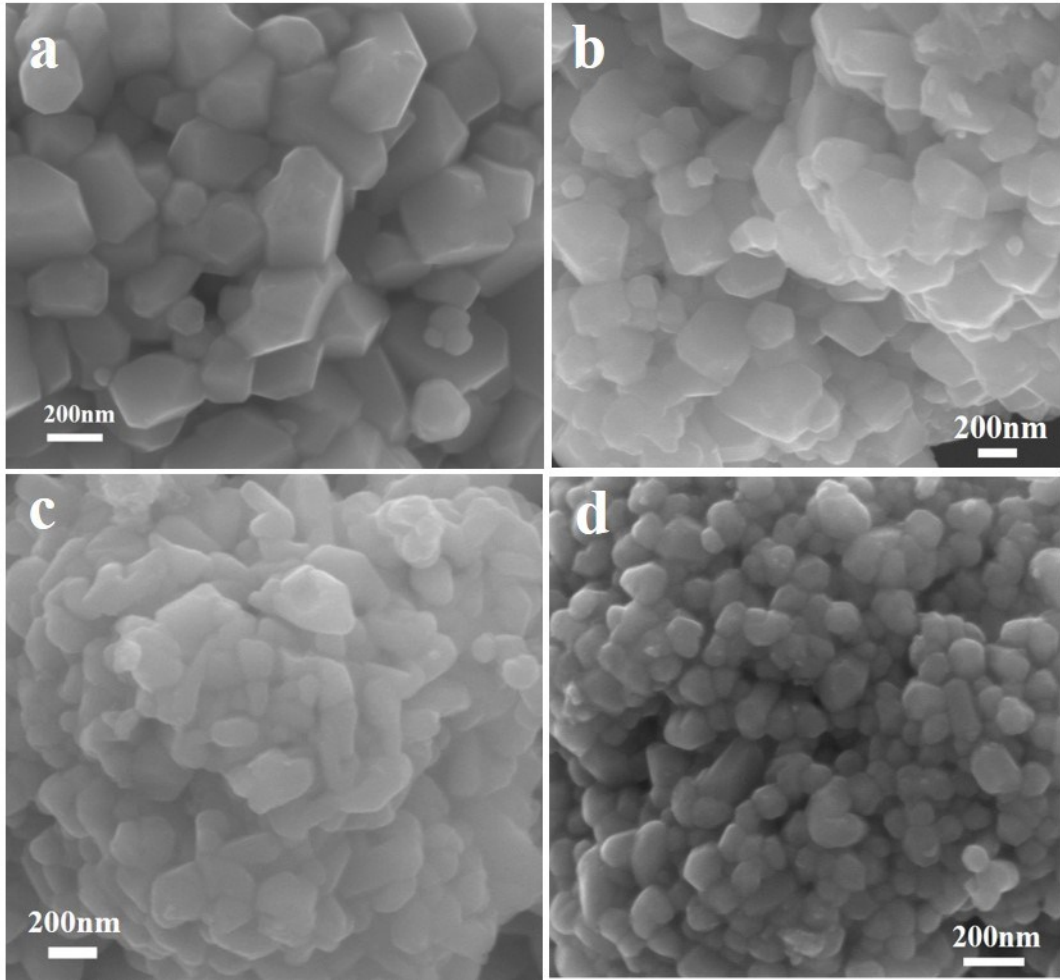

## SEM

**Fig. S1.** Representative SEM images of  $\text{Cu}_{3-y}\text{Ag}_y\text{Sb}_{1-x}\text{Sn}_x\text{Se}_4$  NCs with (a)  $x = 0, y = 0$ ; (b)  $x = 0.02, y = 0$ ; (c)  $x = 0.03, y = 0.1$ ; (d)  $x = 0.05, y = 0.2$ .

**Table S1.** Elements distribution of in-situ nanoinclusions.

| Element | Wt%   | At%   | 3 Sigma |
|---------|-------|-------|---------|
| Ag L    | 2.47  | 1.60  | 0.28    |
| Cu K    | 59.00 | 64.50 | 2.12    |
| Se K    | 38.53 | 33.90 | 10.77   |
| SUM     | 100   | 100   |         |

## **Cu<sub>2.8</sub>Ag<sub>0.2</sub>Sb<sub>0.95</sub>Sn<sub>0.05</sub>Se<sub>4</sub> NCs composition**

The nominal composition of Cu<sub>2.8</sub>Ag<sub>0.2</sub>Sb<sub>0.95</sub>Sn<sub>0.05</sub>Se<sub>4</sub> sample is investigated by an energy dispersive spectrometer (EDS) equipped with a JEOL JSM-7800F instrument, and result is given below.

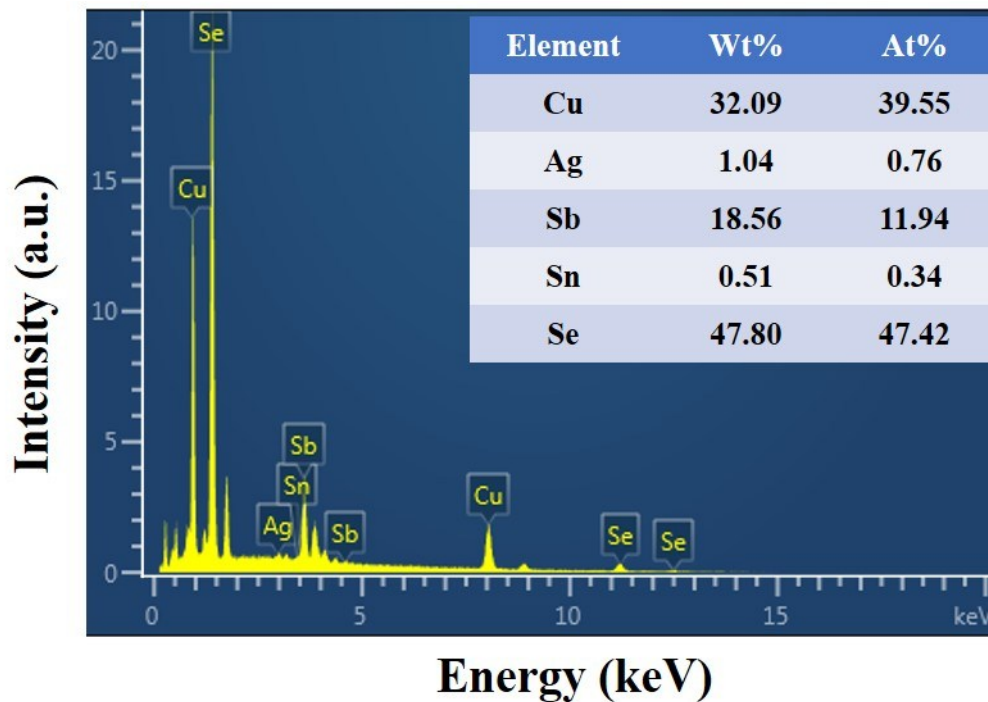

**Fig. S2.** Energy dispersive X-ray spectroscopy spectrum for Cu<sub>2.8</sub>Ag<sub>0.2</sub>Sb<sub>0.97</sub>Sn<sub>0.03</sub>Se<sub>4</sub> NCs and the quantitative analysis.

## Thermal stability

The electrical properties of a new  $\text{Cu}_{2.8}\text{Ag}_{0.2}\text{Sb}_{0.95}\text{Sn}_{0.05}\text{Se}_4$  sample are measured for two heating-cooling cycles between room temperature and up to 623 K. The results are shown below, which suggest good repeatability. The obtained PF values are even better than that of our previous sample.

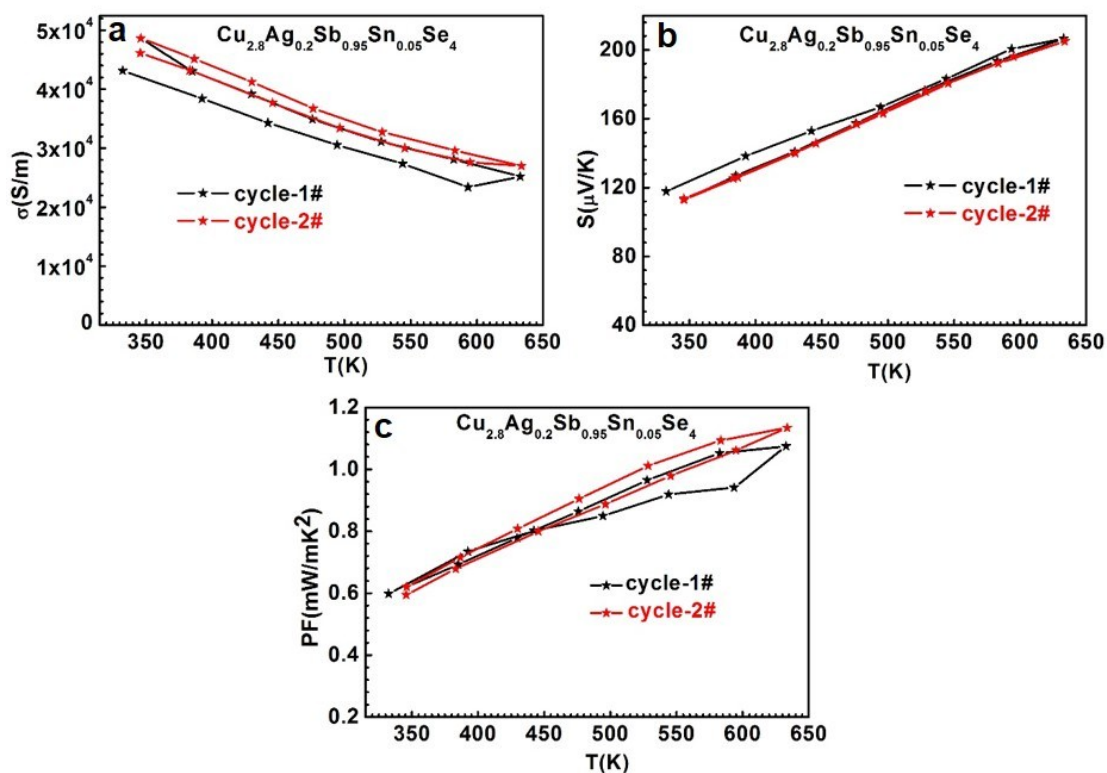

**Fig. S3.** Electrical properties of the  $\text{Cu}_{2.8}\text{Ag}_{0.2}\text{Sb}_{0.95}\text{Sn}_{0.05}\text{Se}_4$  sample measured for two heating-cooling cycles between room temperature and up to 623 K. (a) electrical conductivity ( $\sigma$ ); (b) Seebeck coefficient ( $S$ ); (c) power factor ( $PF$ ).

## Calculation of the Lorenz number

Lattice thermal conductivity ( $\kappa_L$ ) was estimated by subtraction electronic thermal conductivity ( $\kappa_e$ ) from total thermal conductivity ( $\kappa$ ).  $\kappa_e$  was estimated according to the Wiedemann-Franz law,  $\kappa_e = L\sigma T$ , where  $L$  is the Lorenz number that be estimated by assuming the dominance of acoustic phonon scattering and based on a single parabolic band model within the relaxation time approximation.

The Lorenz number  $L$  is calculated from:

$$L = \left(\frac{k_B}{e}\right)^2 \left\{ \frac{\left(r + \frac{7}{2}\right) F_{r+5/2}(\eta)}{\left(r + \frac{3}{2}\right) F_{r+1/2}(\eta)} - \left[ \frac{\left(r + \frac{5}{2}\right) F_{r+3/2}(\eta)}{\left(r + \frac{3}{2}\right) F_{r+1/2}(\eta)} \right]^2 \right\}$$

$$S = \pm \left(\frac{k_B}{e}\right) \left[ \frac{\left(r + \frac{5}{2}\right) F_{r+3/2}(\eta)}{\left(r + \frac{3}{2}\right) F_{r+1/2}(\eta)} - \eta \right]$$

$$F_n(\eta) = \int_0^{\infty} \frac{\chi^n}{1 + e^{\chi - \eta}} d\chi$$

where  $\eta$  is Fermi energy,  $k_B$  is the Boltzmann constant,  $e$  is the electron charge and  $r$  is the scattering factor, here  $r = -1/2$ .
